# Supplementary material
Source: PubMed Central journal article supplement (PMC2973008)
Supplement: 0908091107_pnas.200908091SI.pdf [file 0908091107_pnas.200908091SI.pdf]

# Supporting Information

Hamilton et al. 10.1073/pnas.0908091107

## SI Materials and Methods

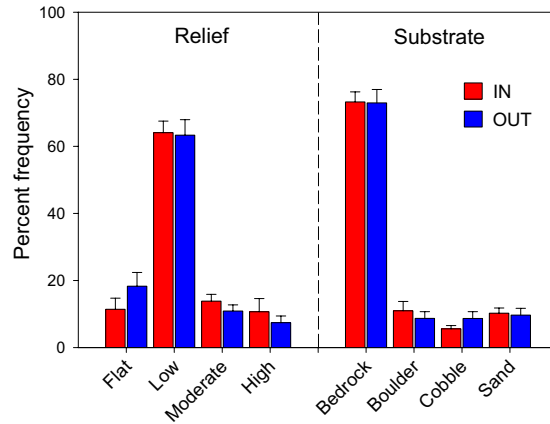

Fig. S1. Percent frequency of different categories of physical relief and substrate types at sites inside and outside of reserves in the Channel Islands. There were no significant differences in relief or substrate type between reserves and nonreserve sites, with the exception of higher frequency of flat relief outside reserves.

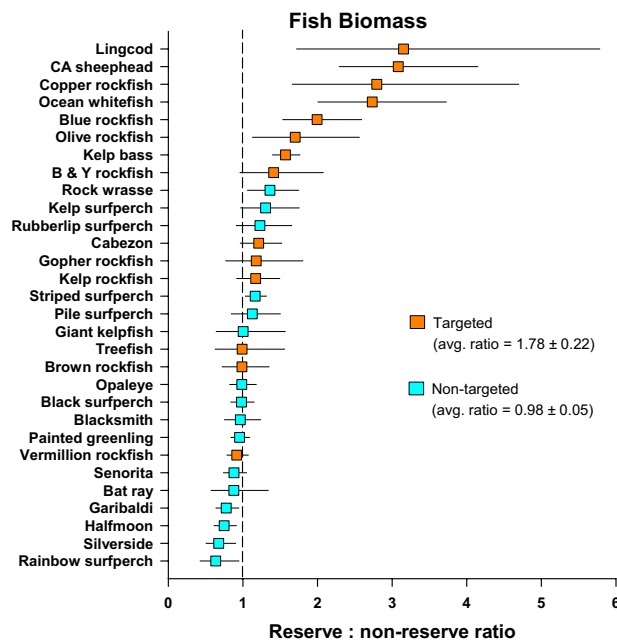

Fig. S2. Average Response Ratios (biomass inside/biomass outside) for individual targeted and nontargeted species of fish in the Channel Islands reserve network. Values represent the back-transformed average of the log response ratios for each island. Values greater than 1 indicate species with higher biomass inside reserves, whereas values less than 1 indicate species with higher biomass outside reserves. Overall, targeted fish species had higher biomass inside reserves relative to outside, whereas nontargeted species showed no differences in biomass inside or outside of reserves. Error bars are  $\pm$  SE.

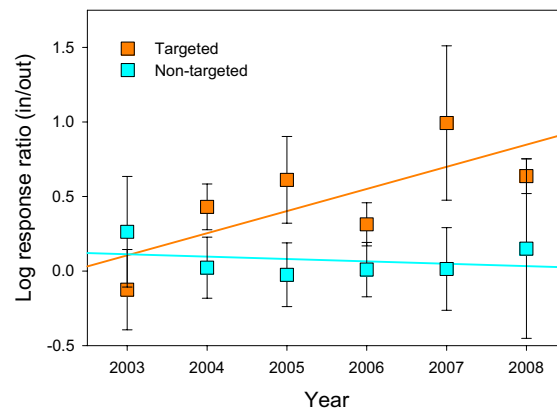

**Fig. S3.** Time series of log response ratios (biomass inside/biomass outside) for targeted and nontargeted fish species in the Channel Islands reserve network. Values represent the ARR using islands as replicates across the different years surveyed since the marine reserves were enacted in 2003. Positive values indicate greater biomass inside reserves and negative values indicate greater biomass outside reserves. The biomass of targeted species increased inside reserves relative to outside, whereas the biomass of nontargeted species showed no change inside or outside of reserves (by ANCOVA, target status  $F_{1,8} = 10.52$ ,  $P = 0.012$ ; year  $F_{1,8} = 3.30$ ,  $P = 0.11$ ; target status  $\times$  year,  $F_{1,8} = 5.07$ ,  $P = 0.054$ ). Error bars represent  $\pm$  SE.

**Table S1. Results of analysis of similarity on fish community structure among the island groups**

| Group comparison             | R statistic | P value      |
|------------------------------|-------------|--------------|
| Anacapa vs. Santa Barbara    | 0.546       | <b>0.002</b> |
| Anacapa vs. Santa Cruz       | 0.078       | 0.22         |
| Anacapa vs. Santa Rosa       | 0.835       | <b>0.002</b> |
| Anacapa vs. San Miguel       | 1           | <b>0.005</b> |
| Santa Barbara vs. Santa Cruz | 0.826       | <b>0.001</b> |
| Santa Barbara vs. Santa Rosa | 0.944       | <b>0.001</b> |
| Santa Barbara vs. San Miguel | 1           | <b>0.005</b> |
| Santa Cruz vs. Santa Rosa    | 0.698       | <b>0.001</b> |
| Santa Cruz vs. San Miguel    | 0.956       | <b>0.001</b> |
| Santa Rosa vs. San Miguel    | 0.072       | 0.26         |

Shown are pairwise tests of significant differences in community structure. Statistically significant values are in bold text. All analyses were conducted in PRIMER 6.0 and used a resemblance matrix of the fourth root transformed abundance data of the 30 most common species surveyed.

**Table S2. Results of canonical analysis of principal coordinates reclassification**

| Original group | Classification |                  |               |               |               | Total | Correct, % |
|----------------|----------------|------------------|---------------|---------------|---------------|-------|------------|
|                | Anacapa I.     | Santa Barbara I. | Santa Cruz I. | San Miguel I. | Santa Rosa I. |       |            |
| Anacapa        | 6              | 0                | 0             | 0             | 0             | 6     | 100        |
| Santa Barbara  | 0              | 6                | 0             | 0             | 0             | 6     | 100        |
| Santa Cruz     | 1              | 0                | 13            | 0             | 0             | 14    | 92.8       |
| San Miguel     | 0              | 0                | 0             | 4             | 0             | 4     | 100        |
| Santa Rosa     | 0              | 0                | 0             | 2             | 10            | 12    | 83.3       |

Shown are cross-validated reclassification probabilities of sites back to their island of origin based on community structure analyses using leave-one-out criteria. All analyses were conducted in PRIMER 6.0 and used a resemblance matrix of the fourth root transformed abundance data of the 30 most common species surveyed.

**Table S3. Densities of common targeted and nontargeted species surveyed in the Channel Islands**

| Species                    | Santa Barbara I. | Anacapa I. | Santa Cruz I. | Santa Rosa I. | San Miguel I. | Magnitude difference (Max/Min)* |
|----------------------------|------------------|------------|---------------|---------------|---------------|---------------------------------|
| <b>Targeted species</b>    |                  |            |               |               |               |                                 |
| Blue rockfish              | 0                | 0.02       | 0.32          | 1.99          | 4.34          | 235×                            |
| Kelp bass                  | 0.24             | 2.34       | 3.91          | 0.25          | 0.03          | 84×                             |
| Olive rockfish             | 0                | 0.02       | 0.23          | 0.73          | 0.93          | 59×                             |
| Kelp rockfish              | 0.04             | 0.10       | 0.69          | 1.10          | 2.06          | 52×                             |
| Copper rockfish            | 0                | 0.01       | 0.01          | 0.09          | 0.19          | 32×                             |
| Vermilion rockfish         | 0                | 0          | 0.002         | 0.015         | 0.047         | 17×                             |
| Ocean whitefish            | 0.09             | 0.09       | 0.10          | 0.01          | 0.01          | 15×                             |
| Cabezon                    | 0.02             | 0          | 0.01          | 0.03          | 0.02          | 13×                             |
| Lingcod                    | 0.01             | 0          | 0.01          | 0.06          | 0.08          | 12×                             |
| Black and yellow rockfish  | 0.01             | 0.03       | 0.06          | 0.09          | 0.06          | 9×                              |
| Gopher rockfish            | 0.02             | 0.02       | 0.03          | 0.08          | 0.14          | 9×                              |
| California sheephead       | 0.66             | 0.79       | 0.93          | 0.97          | 0.26          | 4×                              |
| Brown rockfish             | 0.005            | 0          | 0.011         | 0.018         | 0.007         | 4×                              |
| Treefish                   | 0.02             | 0.06       | 0.05          | 0.02          | 0.03          | 3×                              |
| <b>Nontargeted species</b> |                  |            |               |               |               |                                 |
| Striped surfperch          | 0.01             | 0.03       | 0.29          | 1.22          | 3.35          | 260×                            |
| Garibaldi                  | 0.90             | 1.07       | 1.20          | 0.01          | 0             | 92×                             |
| Silverside                 | 0.44             | 4.69       | 1.96          | 0.74          | 0.09          | 51×                             |
| Blacksmith                 | 23.77            | 18.79      | 17.06         | 1.38          | 0.93          | 25×                             |
| Rainbow surfperch          | 0                | 0.08       | 0.28          | 1.12          | 0.51          | 14×                             |
| Rubberlip surfperch        | 0.01             | 0.04       | 0.30          | 0.17          | 0.03          | 12×                             |
| Halfmoon                   | 1.64             | 0.93       | 0.72          | 0.14          | 0             | 12×                             |
| Kelp surfperch             | 0.25             | 1.66       | 2.78          | 2.63          | 1.26          | 11×                             |
| Opaleye                    | 1.95             | 2.43       | 1.88          | 0.24          | 0             | 10×                             |
| Giant kelpfish             | 0.04             | 0.40       | 0.15          | 0.13          | 0.06          | 10×                             |
| Rock wrasse                | 0.23             | 1.32       | 0.54          | 0             | 0             | 6×                              |
| Black surfperch            | 0.51             | 2.24       | 2.13          | 0.93          | 0.75          | 4×                              |
| Bat ray                    | 0.04             | 0.02       | 0.01          | 0.01          | 0.02          | 4×                              |
| Senorita                   | 12.19            | 11.05      | 9.62          | 10.12         | 3.54          | 3×                              |
| Pile surfperch             | 0.18             | 0.38       | 1.10          | 0.59          | 0.33          | 3×                              |
| Painted greenling          | 0.33             | 0.38       | 0.66          | 0.74          | 0.95          | 3×                              |

Shown are average densities (number of fish per transect) and the magnitude of difference in average density among islands (comparison of highest to lowest).

\*Excluding islands where a species did not occur.

**Table S4. Statistical analysis (ANOVA) of the differences in habitats across reserve and nonreserve sites in the Channel Islands**

| Habitat class/factor | <i>F</i> | <i>P</i> value   |
|----------------------|----------|------------------|
| <b>Relief</b>        |          |                  |
| Flat (0–10 cm)       |          |                  |
| Reserve              | 4.59     | <b>0.035</b>     |
| Island               | 8.73     | <b>&lt;0.001</b> |
| Reserve × Island     | 0.21     | 0.93             |
| Low (10 cm to 1 m)   |          |                  |
| Reserve              | 0.03     | 0.86             |
| Island               | 0.44     | 0.77             |
| Reserve × Island     | 2.47     | 0.052            |
| Moderate (1–2 m)     |          |                  |
| Reserve              | 1.99     | 0.16             |
| Island               | 4.55     | <b>0.002</b>     |
| Reserve × Island     | 0.88     | 0.48             |
| High (>2 m)          |          |                  |
| Reserve              | 1.17     | 0.28             |
| Island               | 4.34     | <b>0.003</b>     |
| Reserve × Island     | 2.27     | 0.07             |
| <b>Substrate</b>     |          |                  |
| Bedrock              |          |                  |
| Reserve              | 0.005    | 0.94             |
| Island               | 3.65     | <b>0.009</b>     |
| Reserve × Island     | 1.21     | 0.31             |
| Boulder              |          |                  |
| Reserve              | 1.23     | 0.27             |
| Island               | 5.60     | <b>0.005</b>     |
| Reserve × Island     | 2.14     | 0.084            |
| Cobble               |          |                  |
| Reserve              | 2.77     | 0.10             |
| Island               | 1.29     | 0.27             |
| Reserve × Island     | 1.99     | 0.11             |
| Sand                 |          |                  |
| Reserve              | 0.07     | 0.79             |
| Island               | 2.85     | <b>0.029</b>     |
| Reserve × Island     | 0.91     | 0.47             |

df = 9, 79 for the full model. The analysis includes the fixed factors of reserve, island (i.e., bioregion), and their interaction.

**Table S5. Statistical analysis of the density responses of individual fish species to MPAs in the Channel Islands**

| Species/factor                  | <i>F</i> | <i>P</i> value |
|---------------------------------|----------|----------------|
| <b>Targeted fish species</b>    |          |                |
| Lingcod                         |          |                |
| Reserve                         | 9.6      | 0.0043         |
| Island                          | 13.1     | <0.0001        |
| Reserve × Island                | 2.3      | 0.08           |
| California sheephead            |          |                |
| Reserve                         | 27.7     | <0.0001        |
| Island                          | 14.2     | <0.0001        |
| Reserve × Island                | 1.6      | 0.19           |
| Copper rockfish                 |          |                |
| Reserve                         | 2.1      | 0.15           |
| Island                          | 12.0     | <0.0001        |
| Reserve × Island                | 3.1      | 0.03           |
| Ocean whitefish                 |          |                |
| Reserve                         | 4.6      | 0.04           |
| Island                          | 3.4      | 0.02           |
| Reserve × Island                | 2.6      | 0.06           |
| Blue rockfish                   |          |                |
| Reserve                         | 1.2      | 0.29           |
| Island                          | 15.9     | <0.0001        |
| Reserve × Island                | 0.3      | 0.88           |
| Olive rockfish                  |          |                |
| Reserve                         | 3.2      | 0.08           |
| Island                          | 8.5      | 0.0001         |
| Reserve × Island                | 1.1      | 0.39           |
| Kelp bass                       |          |                |
| Reserve                         | 0.4      | 0.55           |
| Island                          | 61.0     | <0.0001        |
| Reserve × Island                | 4.2      | 0.008          |
| Black and Yellow rockfish       |          |                |
| Reserve                         | 0.3      | 0.62           |
| Island                          | 8.1      | 0.0001         |
| Reserve × Island                | 1.8      | 0.16           |
| Cabezon                         |          |                |
| Reserve                         | 6.2      | 0.019          |
| Island                          | 3.5      | 0.019          |
| Reserve × Island                | 4.0      | 0.011          |
| Gopher rockfish                 |          |                |
| Reserve                         | 2.6      | 0.11           |
| Island                          | 4.3      | 0.0073         |
| Reserve × Island                | 1.0      | 0.41           |
| Kelp rockfish                   |          |                |
| Reserve                         | 0.06     | 0.81           |
| Island                          | 9.0      | <0.0001        |
| Reserve × Island                | 1.8      | 0.15           |
| Treefish                        |          |                |
| Reserve                         | 0.3      | 0.62           |
| Island                          | 2.6      | 0.053          |
| Reserve × Island                | 1.8      | 0.15           |
| Brown rockfish                  |          |                |
| Reserve                         | 2.2      | 0.15           |
| Island                          | 1.9      | 0.14           |
| Reserve × Island                | 0.9      | 0.49           |
| Vermilion rockfish              |          |                |
| Reserve                         | 0.7      | 0.41           |
| Island                          | 2.8      | 0.042          |
| Reserve × Island                | 0.8      | 0.53           |
| <b>Nontargeted fish species</b> |          |                |
| Rock wrasse                     |          |                |
| Reserve                         | 3.0      | 0.10           |
| Island                          | 7.6      | 0.0002         |
| Reserve × Island                | 2.3      | 0.09           |

Table S5. Cont.

| Species/factor      | F    | P value |
|---------------------|------|---------|
| Kelp surfperch      |      |         |
| Reserve             | 0.01 | 0.92    |
| Island              | 2.4  | 0.07    |
| Reserve × Island    | 0.3  | 0.88    |
| Rubberlip surfperch |      |         |
| Reserve             | 0.01 | 0.93    |
| Island              | 6.3  | 0.0009  |
| Reserve × Island    | 0.2  | 0.93    |
| Striped surfperch   |      |         |
| Reserve             | 0.3  | 0.61    |
| Island              | 27.7 | <0.0001 |
| Reserve × Island    | 1.7  | 0.17    |
| Pile surfperch      |      |         |
| Reserve             | 2.1  | 0.16    |
| Island              | 12.9 | <0.0001 |
| Reserve × Island    | 1.3  | 0.3     |
| Giant kelpfish      |      |         |
| Reserve             | 0.7  | 0.42    |
| Island              | 4.0  | 0.01    |
| Reserve × Island    | 0.3  | 0.88    |
| Opaleye             |      |         |
| Reserve             | 1.8  | 0.19    |
| Island              | 27.9 | <0.0001 |
| Reserve × Island    | 1.1  | 0.37    |
| Black surfperch     |      |         |
| Reserve             | 0.01 | 0.94    |
| Island              | 15.3 | <0.0001 |
| Reserve × Island    | 0.59 | 0.68    |
| Blacksmith          |      |         |
| Reserve             | 0.6  | 0.46    |
| Island              | 11.7 | <0.0001 |
| Reserve × Island    | 4.4  | 0.007   |
| Painted greenling   |      |         |
| Reserve             | 2.0  | 0.17    |
| Island              | 13.5 | <0.0001 |
| Reserve × Island    | 3.2  | 0.025   |
| Senorita            |      |         |
| Reserve             | 0.1  | 0.75    |
| Island              | 3.7  | 0.014   |
| Reserve × Island    | 1.3  | 0.29    |
| Bat ray             |      |         |
| Reserve             | 0.01 | 0.98    |
| Island              | 1.1  | 0.37    |
| Reserve × Island    | 1.5  | 0.22    |
| Garibaldi           |      |         |
| Reserve             | 1.7  | 0.20    |
| Island              | 56.7 | <0.0001 |
| Reserve × Island    | 8.7  | <0.0001 |
| Halfmoon            |      |         |
| Reserve             | 0.8  | 0.39    |
| Island              | 5.7  | 0.0015  |
| Reserve × Island    | 0.6  | 0.67    |
| Silverside          |      |         |
| Reserve             | 2.2  | 0.15    |
| Island              | 3.3  | 0.023   |
| Reserve × Island    | 0.6  | 0.67    |
| Rainbow surfperch   |      |         |
| Reserve             | 0.8  | 0.37    |
| Island              | 2.8  | 0.045   |
| Reserve × Island    | 0.7  | 0.61    |

Analysis includes the factors of reserve and island (i.e., bioregion) and their interaction.

**Table S6. Statistical analysis of the biomass response of individual fish species to MPAs in the Channel Islands**

| Species/factor                  | F    | P value           |
|---------------------------------|------|-------------------|
| <b>Targeted fish species</b>    |      |                   |
| Lingcod                         |      |                   |
| Reserve                         | 4.2  | <b>0.05</b>       |
| Island                          | 5.3  | <b>0.0025</b>     |
| Reserve × Island                | 1.6  | 0.19              |
| California sheephead            |      |                   |
| Reserve                         | 21.9 | <b>&lt;0.0001</b> |
| Island                          | 17.4 | <b>&lt;0.0001</b> |
| Reserve × Island                | 3.1  | <b>0.03</b>       |
| Copper rockfish                 |      |                   |
| Reserve                         | 2.9  | 0.10              |
| Island                          | 12.0 | <b>&lt;0.0001</b> |
| Reserve × Island                | 2.4  | 0.07              |
| Ocean whitefish                 |      |                   |
| Reserve                         | 1.0  | 0.33              |
| Island                          | 0.8  | 0.54              |
| Reserve × Island                | 3.3  | <b>0.023</b>      |
| Blue rockfish                   |      |                   |
| Reserve                         | 1.7  | 0.19              |
| Island                          | 15.2 | <b>&lt;0.0001</b> |
| Reserve × Island                | 0.9  | 0.45              |
| Olive rockfish                  |      |                   |
| Reserve                         | 8.5  | <b>0.0066</b>     |
| Island                          | 18.8 | <b>&lt;0.0001</b> |
| Reserve × Island                | 2.7  | 0.051             |
| Kelp bass                       |      |                   |
| Reserve                         | 7.1  | <b>0.012</b>      |
| Island                          | 21.8 | <b>&lt;0.0001</b> |
| Reserve × Island                | 1.4  | 0.27              |
| Black and Yellow rockfish       |      |                   |
| Reserve                         | 1.0  | 0.32              |
| Island                          | 13.1 | <b>&lt;0.0001</b> |
| Reserve × Island                | 2.9  | <b>0.04</b>       |
| Cabezon                         |      |                   |
| Reserve                         | 2.9  | 0.09              |
| Island                          | 2.8  | <b>0.043</b>      |
| Reserve × Island                | 2.7  | <b>0.048</b>      |
| Gopher rockfish                 |      |                   |
| Reserve                         | 2.9  | 0.097             |
| Island                          | 4.8  | <b>0.004</b>      |
| Reserve × Island                | 0.7  | 0.58              |
| Kelp rockfish                   |      |                   |
| Reserve                         | 0.4  | 0.55              |
| Island                          | 7.9  | <b>0.0002</b>     |
| Reserve × Island                | 0.8  | 0.52              |
| Treefish                        |      |                   |
| Reserve                         | 0.3  | 0.62              |
| Island                          | 1.8  | 0.15              |
| Reserve × Island                | 1.4  | 0.25              |
| Brown rockfish                  |      |                   |
| Reserve                         | 2.0  | 0.17              |
| Island                          | 0.6  | 0.64              |
| Reserve × Island                | 1.0  | 0.43              |
| Vermilion rockfish              |      |                   |
| Reserve                         | 0.7  | 0.40              |
| Island                          | 1.6  | 0.20              |
| Reserve × Island                | 1.2  | 0.35              |
| <b>Nontargeted fish species</b> |      |                   |
| Rock wrasse                     |      |                   |
| Reserve                         | 2.7  | 0.11              |
| Island                          | 22.4 | <b>&lt;0.0001</b> |
| Reserve × Island                | 3.2  | <b>0.026</b>      |

**Table S6. Cont.**

| Species/factor      | F    | P value           |
|---------------------|------|-------------------|
| Kelp surfperch      |      |                   |
| Reserve             | 0.02 | 0.90              |
| Island              | 2.5  | 0.07              |
| Reserve × Island    | 0.2  | 0.95              |
| Rubberlip surfperch |      |                   |
| Reserve             | 0.03 | 0.85              |
| Island              | 8.4  | <b>0.0001</b>     |
| Reserve × Island    | 0.4  | 0.81              |
| Striped surfperch   |      |                   |
| Reserve             | 0.5  | 0.49              |
| Island              | 23.2 | <b>&lt;0.0001</b> |
| Reserve × Island    | 1.0  | 0.40              |
| Pile surfperch      |      |                   |
| Reserve             | 2.4  | 0.13              |
| Island              | 11.3 | <b>&lt;0.0001</b> |
| Reserve × Island    | 1.8  | 0.15              |
| Giant kelpfish      |      |                   |
| Reserve             | 0.6  | 0.43              |
| Island              | 3.0  | <b>0.035</b>      |
| Reserve × Island    | 4.0  | <b>0.01</b>       |
| Opaleye             |      |                   |
| Reserve             | 0.3  | 0.57              |
| Island              | 26.7 | <b>&lt;0.0001</b> |
| Reserve × Island    | 1.0  | 0.43              |
| Black surfperch     |      |                   |
| Reserve             | 0.1  | 0.71              |
| Island              | 11.2 | <b>&lt;0.0001</b> |
| Reserve × Island    | 0.9  | 0.49              |
| Blacksmith          |      |                   |
| Reserve             | 0.1  | 0.77              |
| Island              | 5.8  | <b>0.0014</b>     |
| Reserve × Island    | 1.5  | 0.23              |
| Painted greenling   |      |                   |
| Reserve             | 2.2  | 0.15              |
| Island              | 15.7 | <b>&lt;0.0001</b> |
| Reserve × Island    | 3.1  | <b>0.03</b>       |
| Senorita            |      |                   |
| Reserve             | 0.8  | 0.39              |
| Island              | 5.1  | <b>0.003</b>      |
| Reserve × Island    | 0.9  | 0.50              |
| Bat ray             |      |                   |
| Reserve             | 0.5  | 0.50              |
| Island              | 1.0  | 0.45              |
| Reserve × Island    | 1.9  | 0.14              |
| Garibaldi           |      |                   |
| Reserve             | 2.9  | 0.09              |
| Island              | 43.5 | <b>&lt;0.0001</b> |
| Reserve × Island    | 6.1  | <b>0.0011</b>     |
| Halfmoon            |      |                   |
| Reserve             | 1.3  | 0.26              |
| Island              | 10.7 | <b>&lt;0.0001</b> |
| Reserve × Island    | 1.4  | 0.26              |
| Silverside          |      |                   |
| Reserve             | 6.9  | <b>0.013</b>      |
| Island              | 1.8  | 0.15              |
| Reserve × Island    | 1.3  | 0.28              |
| Rainbow surfperch   |      |                   |
| Reserve             | 0.4  | 0.53              |
| Island              | 1.7  | 0.17              |
| Reserve × Island    | 0.9  | 0.45              |

Analysis includes the factors of reserve and island (i.e., bioregion) and their interaction.



**Table S7. Table of the physical attributes of the individual Channel Island MPAs, noting which ones are included in the study**

| Name                | Island        | Size, nm <sup>2</sup> | Length of coastline, nm | Surveyed by PISCO |
|---------------------|---------------|-----------------------|-------------------------|-------------------|
| Santa Barbara SMR   | Santa Barbara | 13.2                  | 1                       | Yes               |
| Anacapa SMR         | Anacapa       | 11.7                  | 3.3                     | Yes               |
| Anacapa SMCA        | Anacapa       | 8.1                   | 2.2                     | Yes               |
| Scorpion SMR        | Santa Cruz    | 10.3                  | 3.3                     | Yes               |
| Gull Island SMR     | Santa Cruz    | 16.1                  | 2.9                     | Yes               |
| Painted Cave SMCA   | Santa Cruz    | 2.1                   | 2                       | Yes               |
| Skunk Point SMR     | Santa Rosa    | 1.4                   | 2.7                     | No                |
| Carrington SMR      | Santa Rosa    | 13.3                  | 5.3                     | Yes               |
| South Point SMR     | Santa Rosa    | 10.8                  | 3.8                     | Yes               |
| Harris Point SMR    | San Miguel    | 18.2                  | 6.3                     | Yes               |
| Judith Rock SMR     | San Miguel    | 5.1                   | 1.4                     | No                |
| Richardson Rock SMR | San Miguel    | 32.2                  | NA                      | No                |

Areas and length of coastline refer to the MPAs in state waters and are reported in nautical miles. NA, not applicable. Source: McArdle D, Hastings S, Ugoretz J (2003) California Marine Protected Areas Update. California Seagrant Publication No T-051.
